# Supplementary material for: Pt nanoparticle and CdS quantum dot assisted WO3 nanowires grown on flexible carbon fibers for efficient oxygen production
Source: Royal Society of Chemistry journal article supplement (doi:10.1039/c3ce41826j), 2013-11-01
Supplement: c3ce41826j.pdf [file c3ce41826j.pdf]

## Supporting Information

### Pt nanoparticles and CdS quantum dots assisted WO<sub>3</sub> nanowires grown on flexible carbon fibers for efficient oxygen production

Fengmei Wang,<sup>a</sup> Yajun Wang,<sup>a</sup> Xueying Zhan,<sup>a</sup> Muhammad Safdar,<sup>a</sup> Jianru Gong,<sup>\*a</sup> and Jun He<sup>\*a</sup>

National Center for Nanoscience and Technology, Beijing 100190, P. R. China

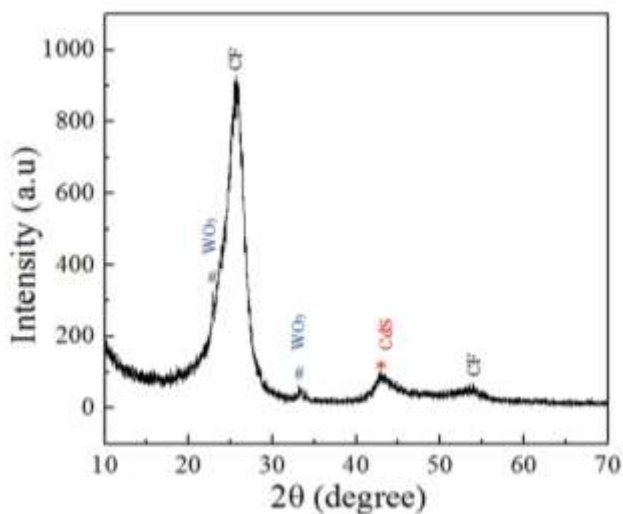

**Fig. S1.** XRD pattern of CF-WO<sub>3</sub>-Pt-CdS heterostructure. Their characteristic diffraction peaks were identified and can be indexed to WO<sub>3</sub> monoclinic structure and CdS hexagonal structure (standard cards JCPDS No. 89-4476 and JCPDS No. 08-0459) respectively.

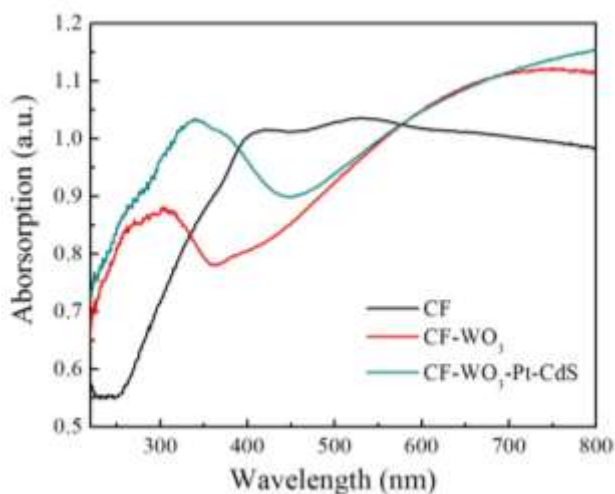

**Fig.S2.** UV-Vis diffuse reflectance spectra of carbon fibers (black), CF-WO<sub>3</sub> (red), and CF-WO<sub>3</sub>-Pt-CdS (cyan) samples

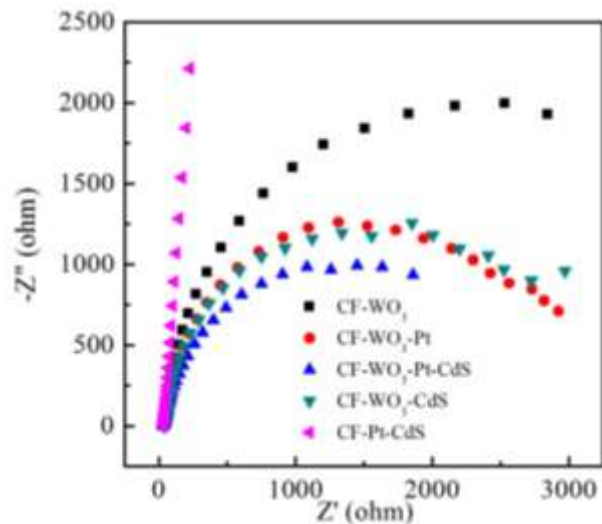

**Fig.S3.** EIS Nyquist plots of (a) the CF-WO<sub>3</sub> (black), CF-WO<sub>3</sub>-Pt (red), CF-WO<sub>3</sub>-Pt-CdS (blue), CF-WO<sub>3</sub>-CdS (cyan) and CF-Pt-CdS (peak) electrodes under visible irradiation ( $\lambda > 420$  nm).

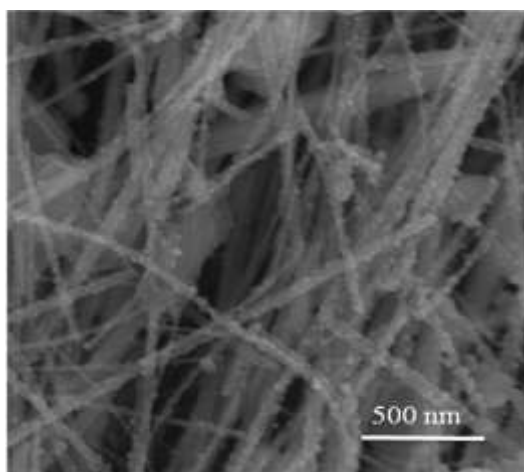

**Fig.S4.** SEM image of CF-WO<sub>3</sub>-Pt-CdS after the photocatalytic O<sub>2</sub> production in the presence of AgNO<sub>3</sub> as sacrificial electron scavenger.

### Photodegradation of MB experiments

The photocatalytic activities of as-prepared samples were evaluated by the photodegradation of  $1.0 \times 10^{-5}$  M MB under visible irradiation ( $120 \text{ mW} \cdot \text{cm}^{-2}$ ,  $\lambda > 420 \text{ nm}$ ). A quartz tube with capacity of 80 mL MB solution serves as a photoreactor vessel. Prior to turning on the light, WO<sub>3</sub>-Pt-CdS nanowires was immersed in the 80 mL MB solution with magnetically stirring for 30 min in dark to ensure the absorption equilibrium between the photocatalyst and the MB molecules. During the photocatalytic process, the sample was fixed on the quartz tube and irradiated straightly with the light keeping magnetically stirring to ensure the

uniform degradation. 3 mL of the MB solution was sampled at given time intervals (30 min) and the concentration of MB was analyzed by the corresponding variations of absorption at maximum absorption wavelength of 663 nm in a UV-Vis spectrophotometer ( $\lambda = 663$  nm).

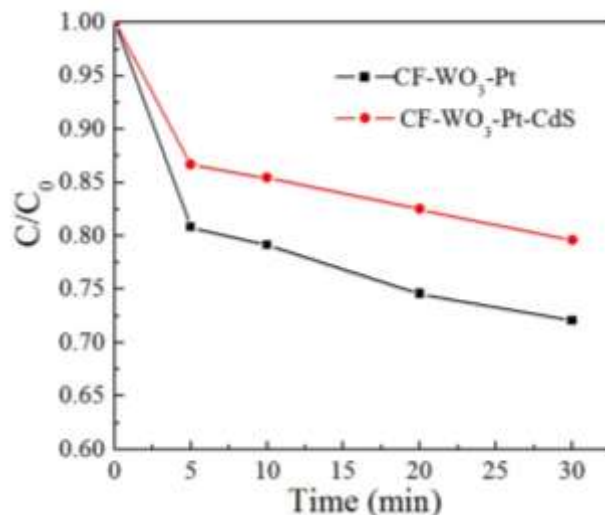

**Fig.S5.** The adsorption of MB on CF-WO<sub>3</sub>-Pt (black), and CF-WO<sub>3</sub>-Pt-CdS (red) heterostructure under dark.

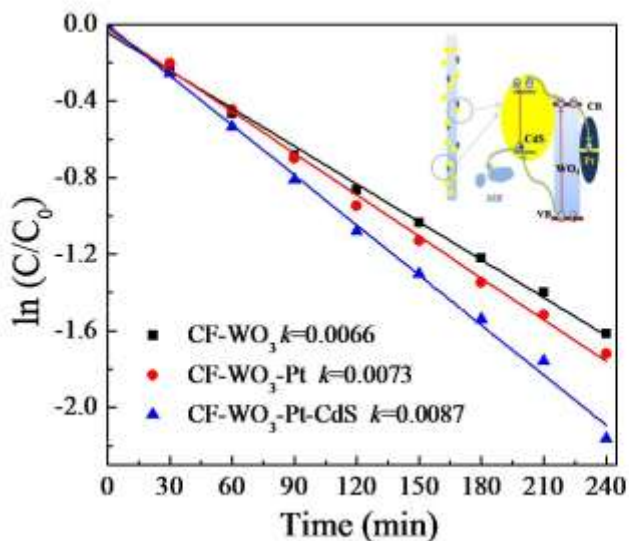

**Fig.S6.** Visible-light-driven photodegradation of MB (10<sup>-5</sup> M) by CF-WO<sub>3</sub> (black), CF-WO<sub>3</sub>-Pt (red), and CF-WO<sub>3</sub>-Pt-CdS (blue) heterostructure (MB initial concentration=1.0×10<sup>-5</sup> M). The inset figure is the schematic for the energy band structure of the CF-WO<sub>3</sub>-Pt-CdS heterostructure and proposed mechanism of MB degradation.
